# Supplementary material for: First total synthesis of cryptopyranmoscatone A2 from d-ribose
Source: Royal Society of Chemistry journal article supplement (doi:10.1039/c5ra03706a), 2015-01-01

## Supporting Information

### First Total Synthesis of Cryptopyranmoscatone A2

A. Maheswara Reddy,<sup>a</sup> Gowravaram Sabitha\*<sup>a</sup> and Sirisha Katukuri<sup>b</sup>

*<sup>a</sup>Natural Products Chemistry Division, CSIR-Indian Institute of Chemical Technology, Hyderabad 500 007, India, Fax: +91-40-27160512. E-mail: gowravaramsr@yahoo.com; sabitha@iict.res.in*

*<sup>b</sup>Nuclear Magnetic Resonance Division, CSIR-Indian Institute of Chemical Technology, Hyderabad 500 007, India*

|                                                                        |        |
|------------------------------------------------------------------------|--------|
| 1. <sup>1</sup> H NMR and <sup>13</sup> C NMR Spectra of All Compounds | 2 – 13 |
| 2. NOESY Spectrum of Compound <b>9</b>                                 | 14     |

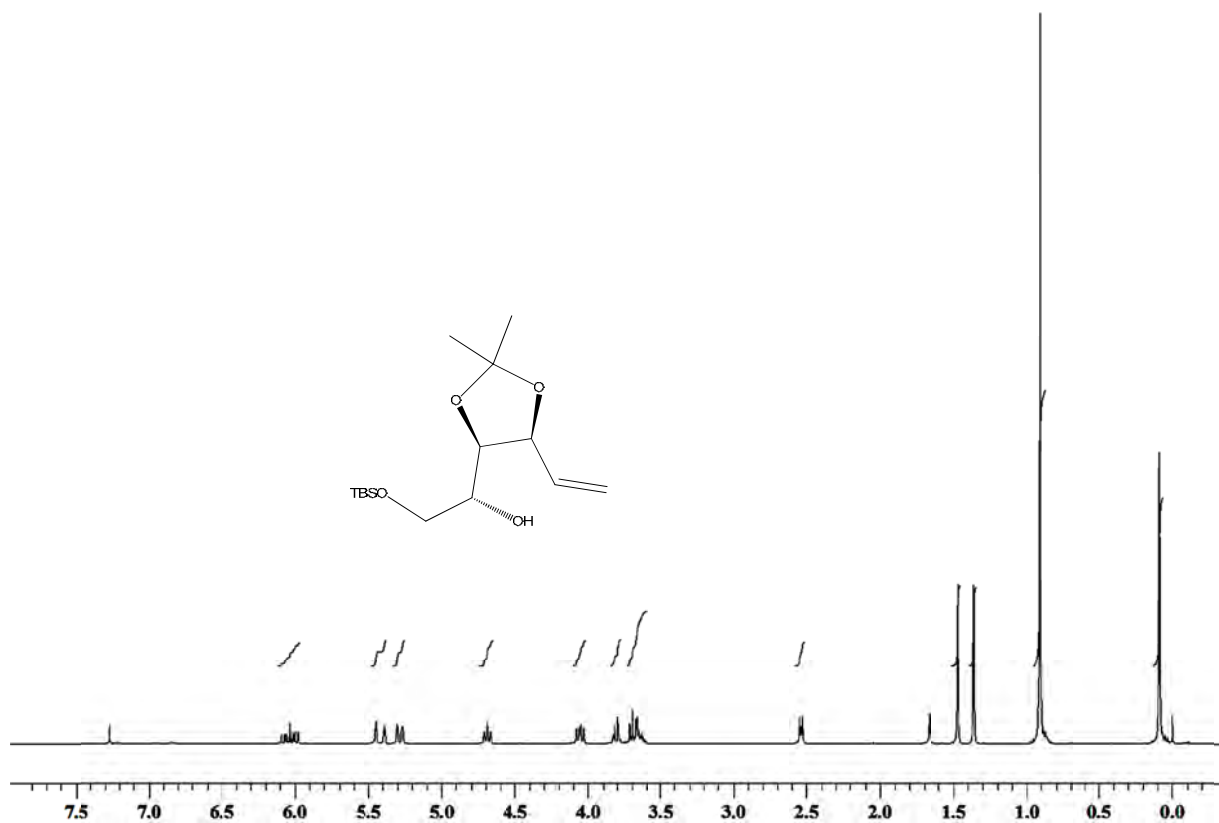

**$^1\text{H-NMR}$  OF COMPOUND 12**

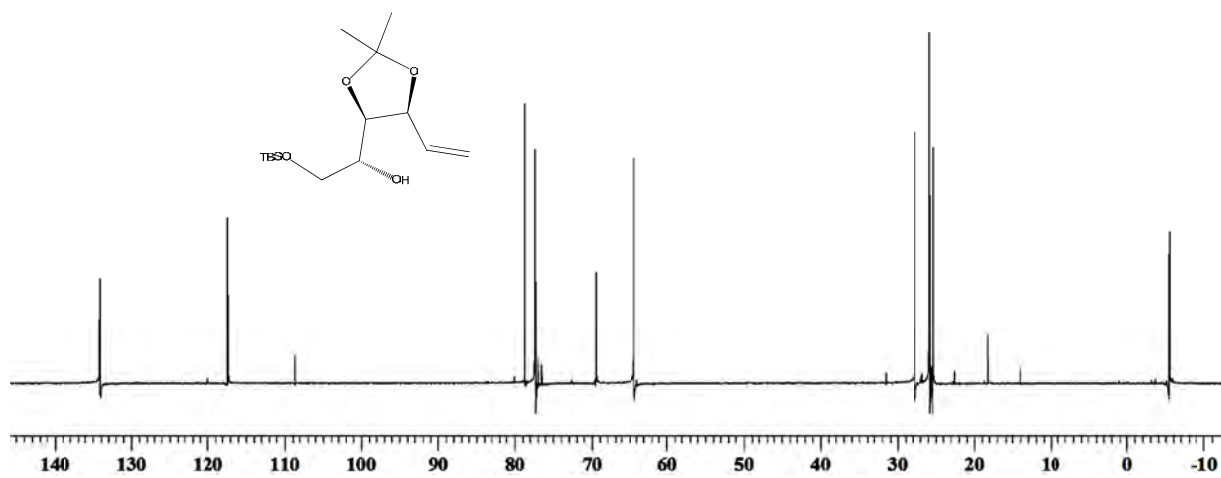

### <sup>13</sup>C-NMR OF COMPOUND 12

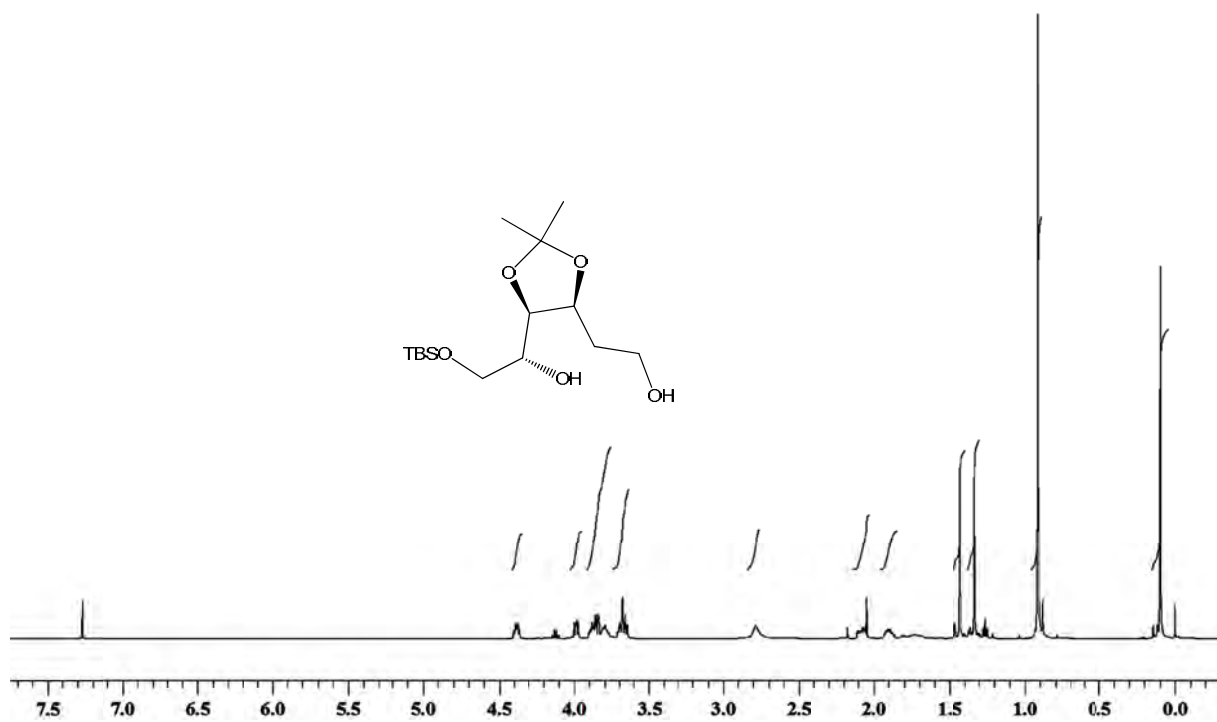

### <sup>1</sup>H-NMR OF COMPOUND 13

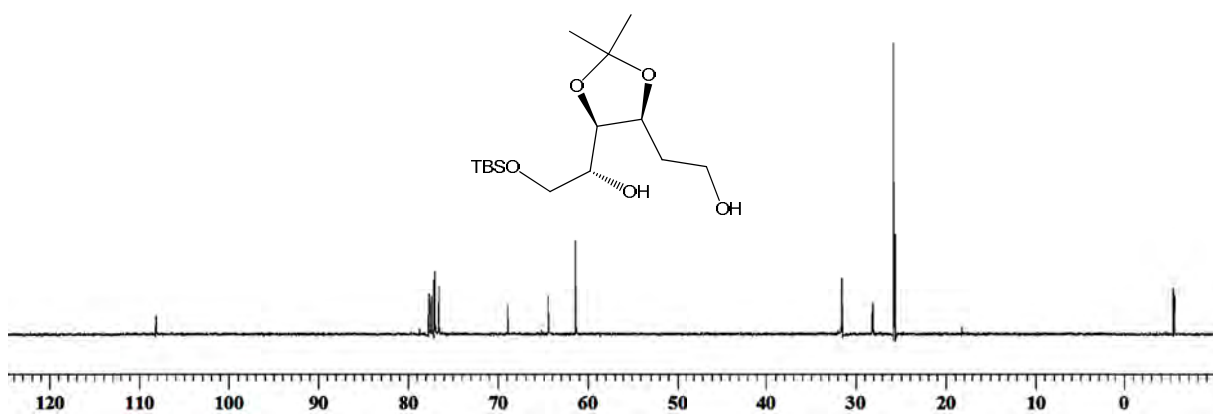

### <sup>13</sup>C-NMR OF COMPOUND 13

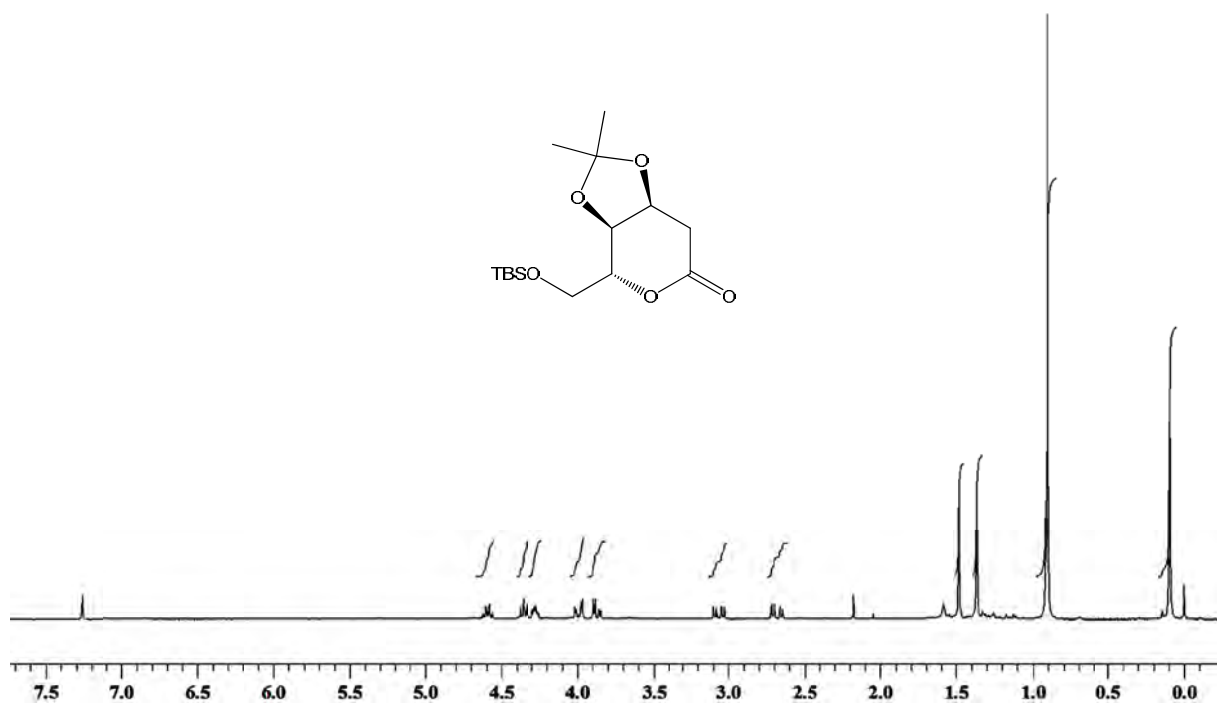

**<sup>1</sup>H-NMR OF COMPOUND 10**

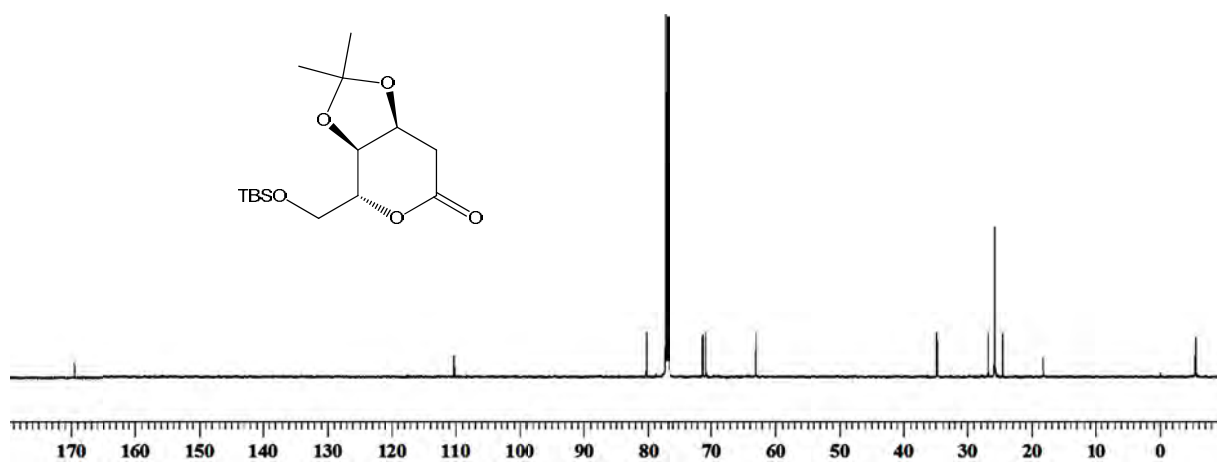

**<sup>13</sup>C-NMR OF COMPOUND 10**

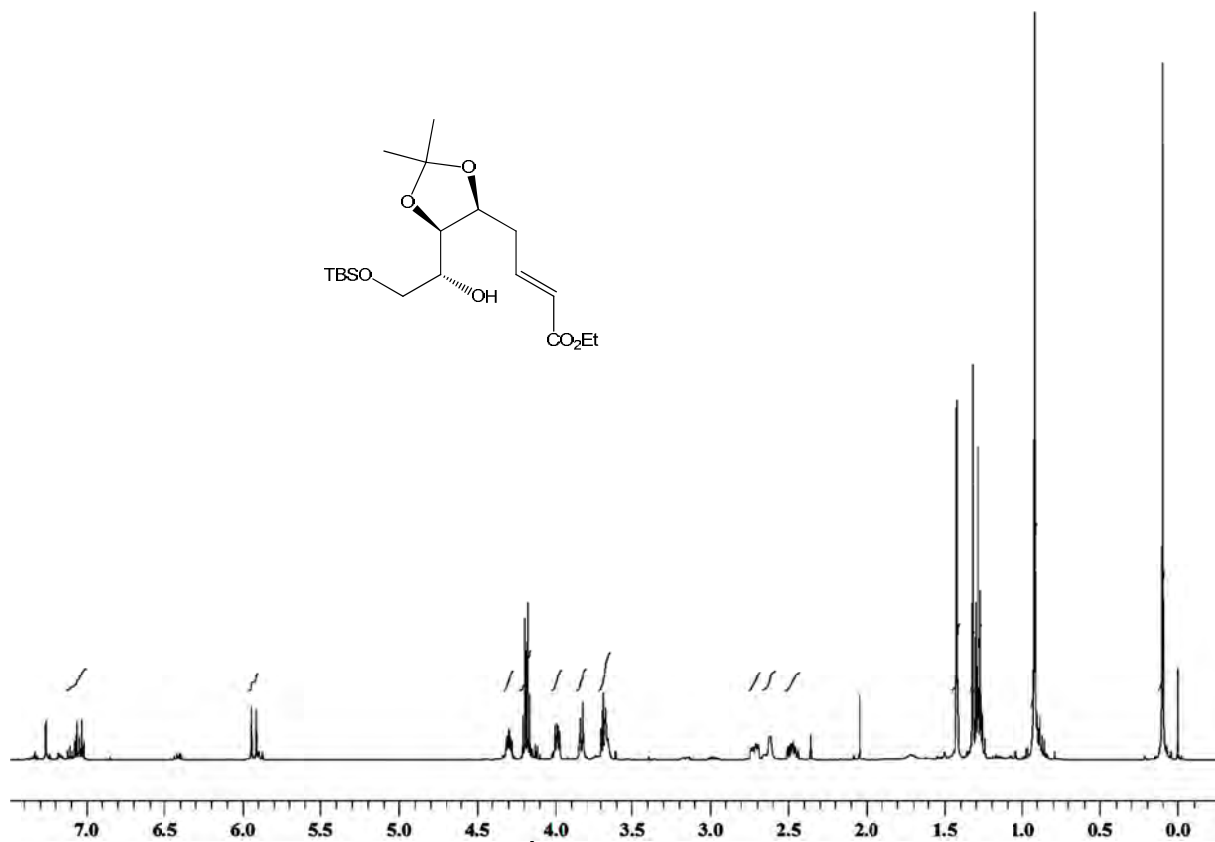

### H-NMR OF COMPOUND 7

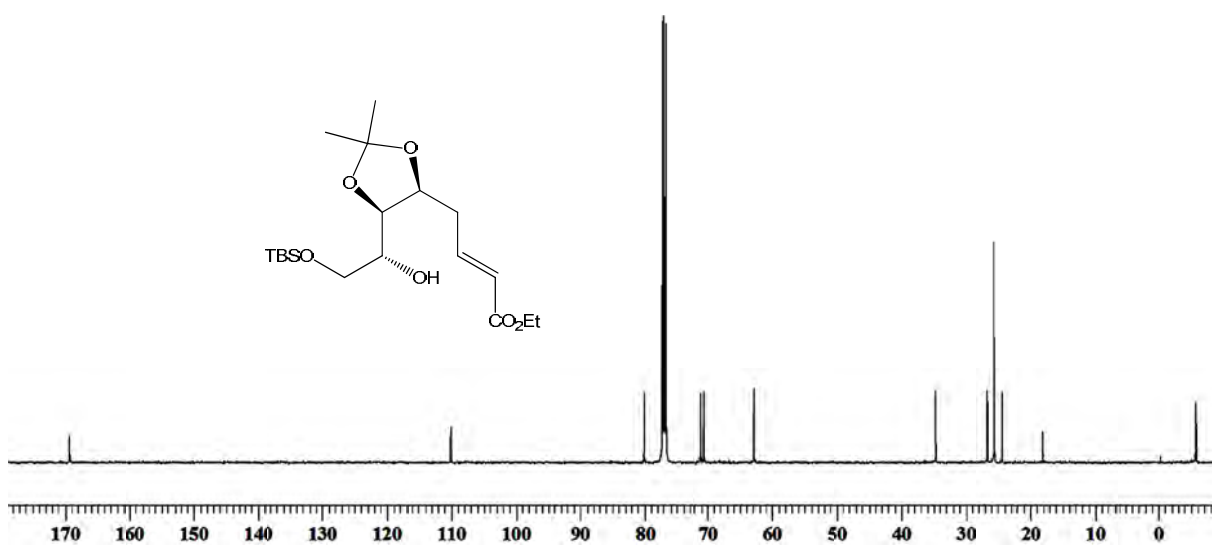

### <sup>13</sup>C-NMR OF COMPOUND 7

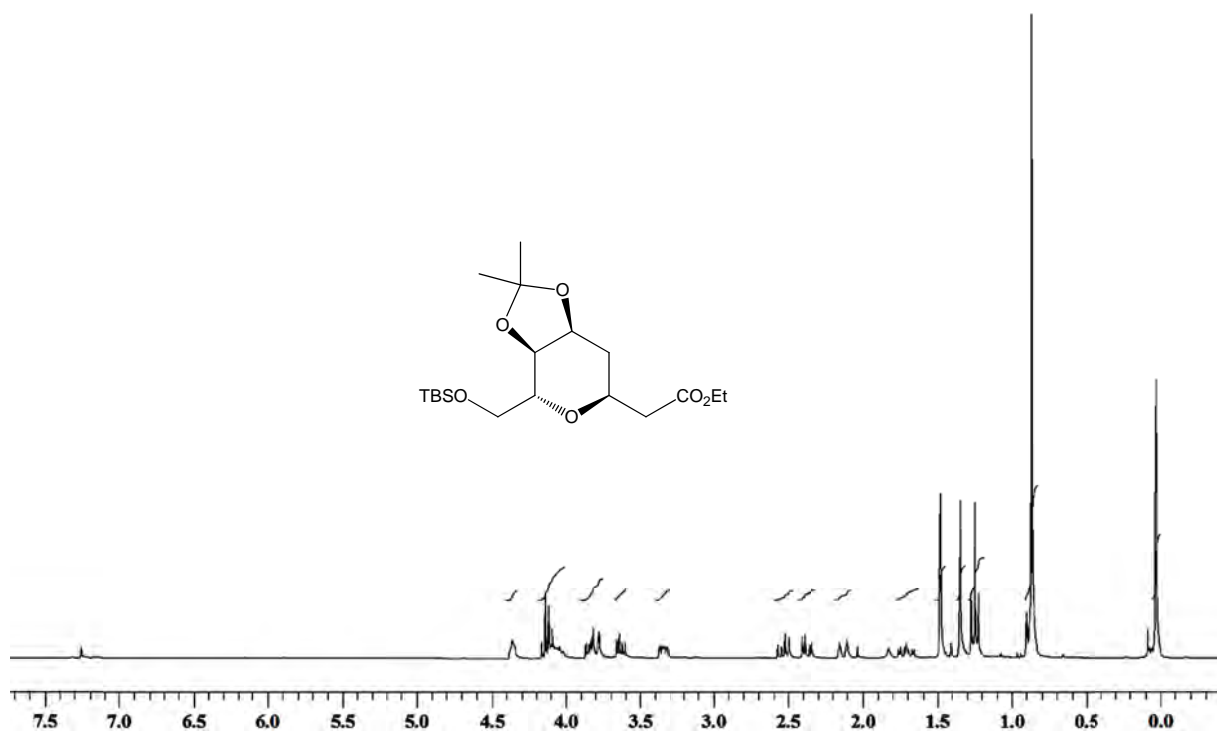

### <sup>1</sup>H-NMR OF COMPOUND 9

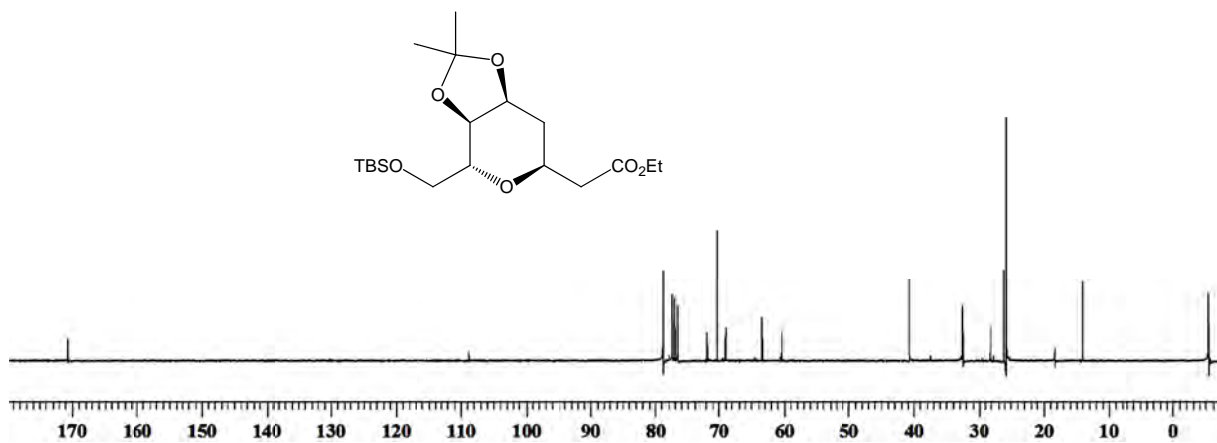

### <sup>13</sup>C-NMR OF COMPOUND 9

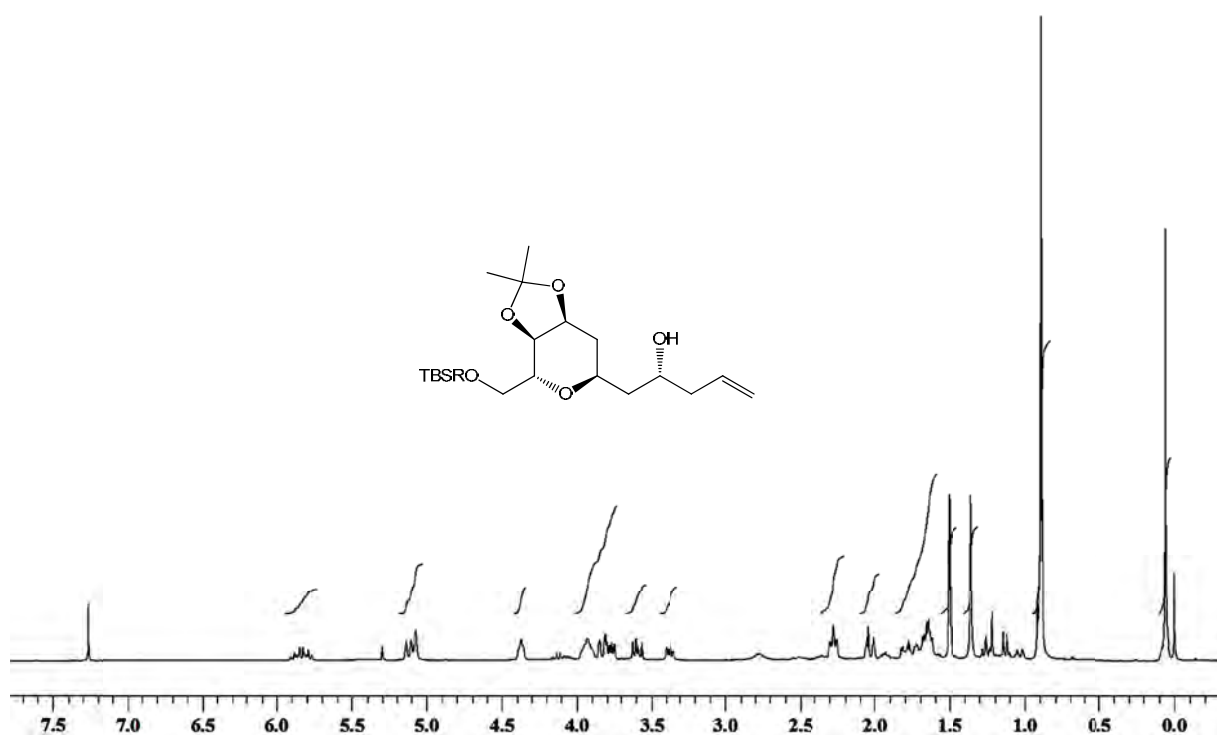

**<sup>1</sup>H-NMR OF COMPOUND 14**

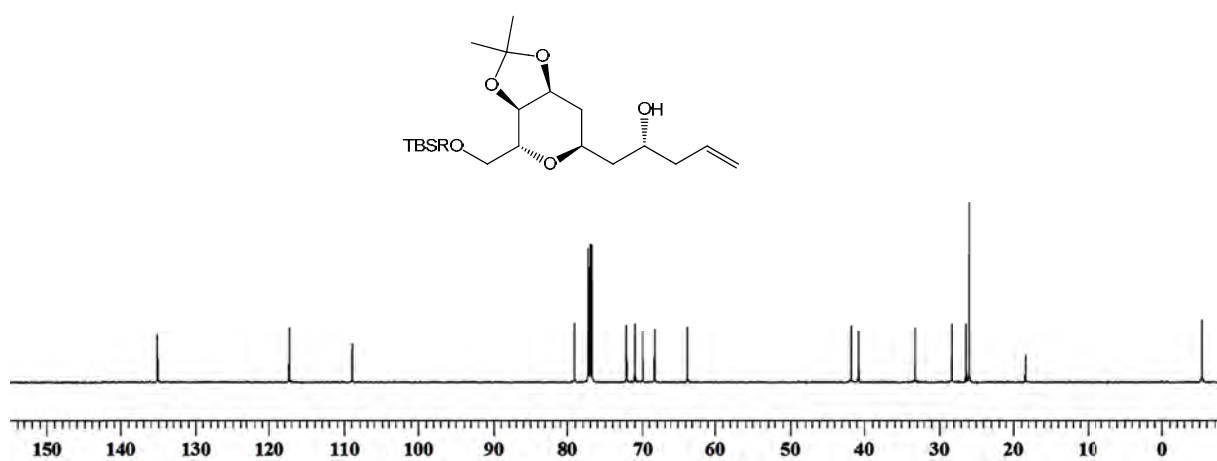

**<sup>13</sup>C-NMR OF COMPOUND 14**

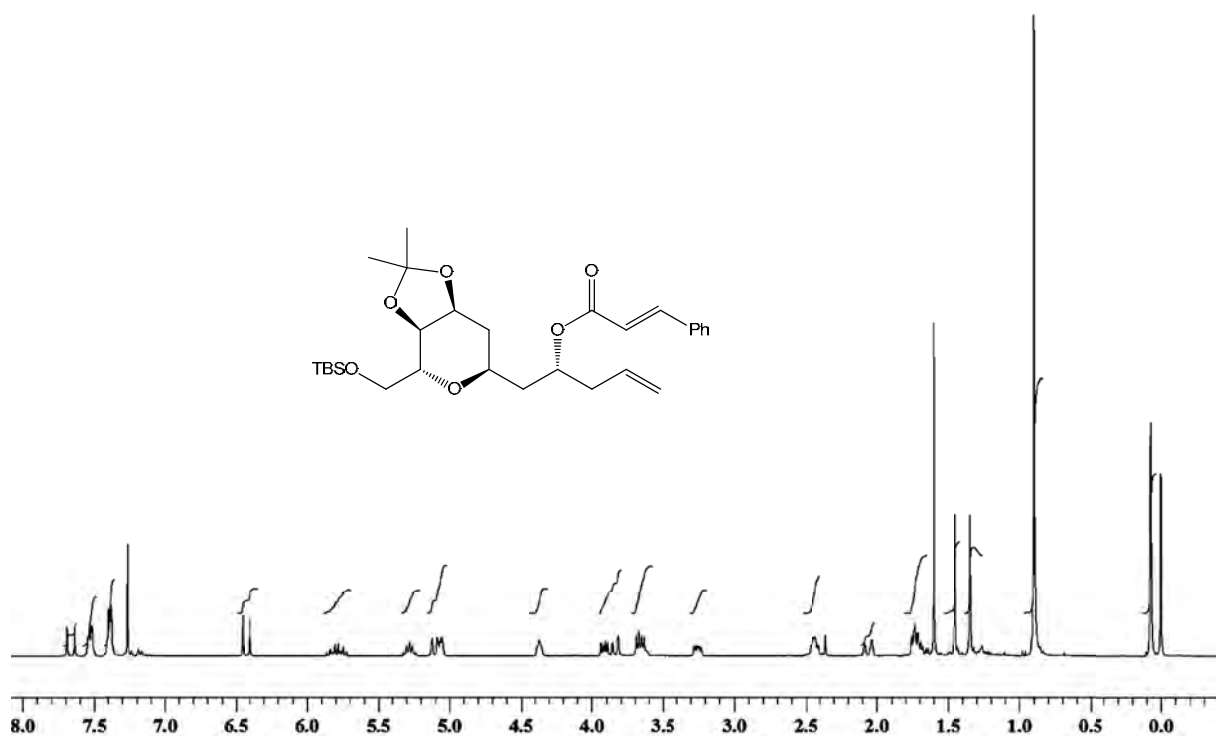

**<sup>1</sup>H-NMR OF COMPOUND 8**

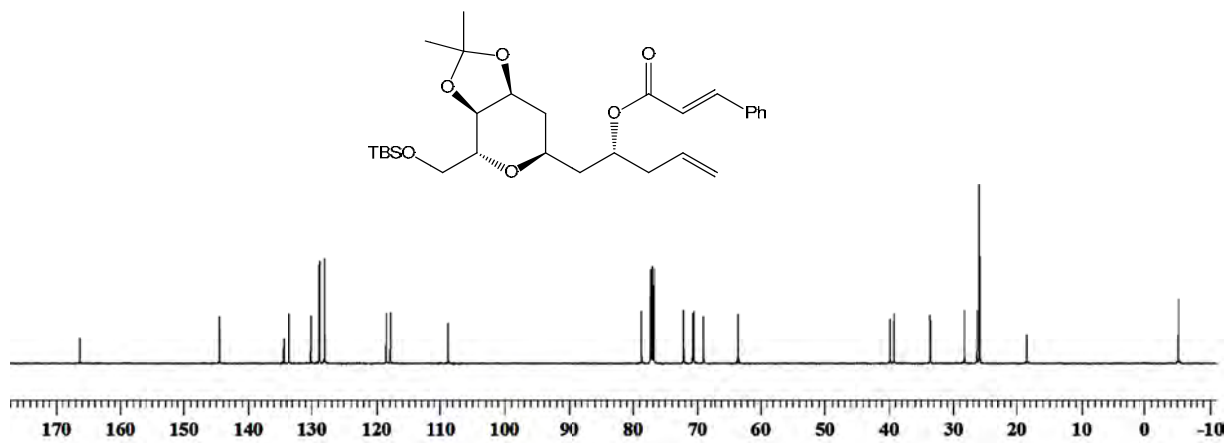

**<sup>13</sup>C-NMR OF COMPOUND 8**



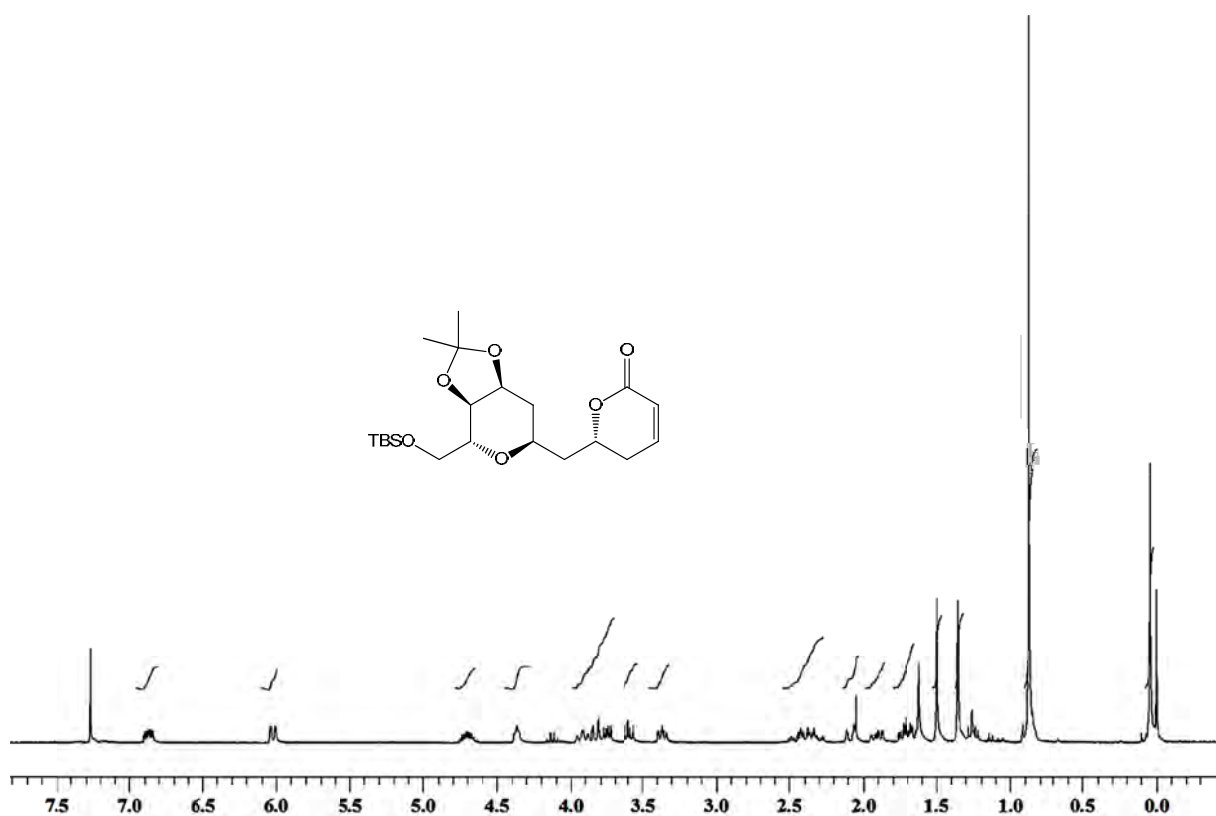

**<sup>1</sup>H-NMR OF COMPOUND 15**

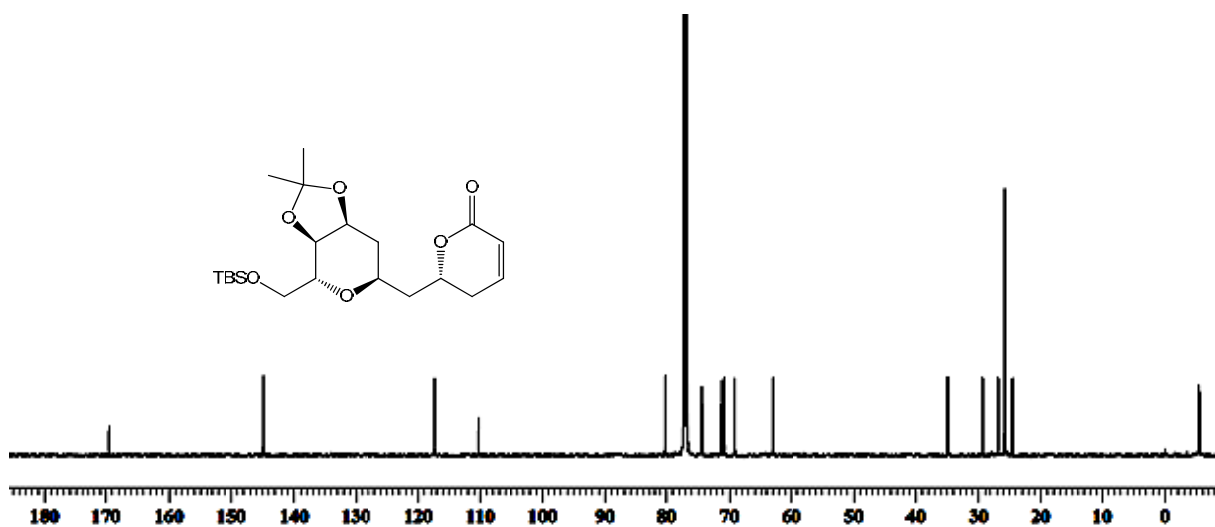

**<sup>13</sup>C-NMR OF COMPOUND 15**

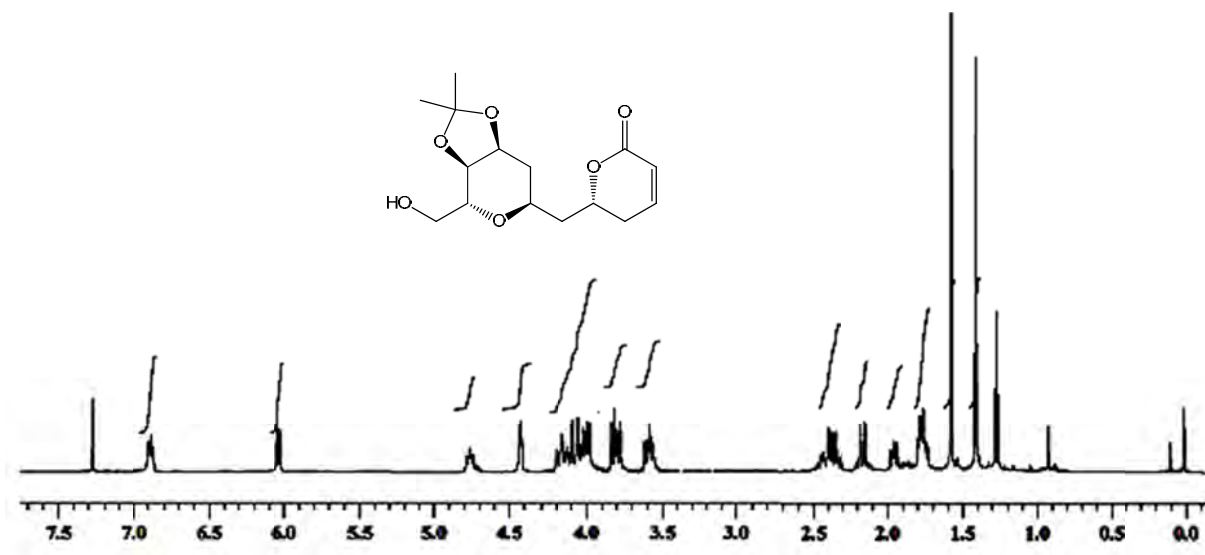

**<sup>1</sup>H-NMR OF COMPOUND 16**

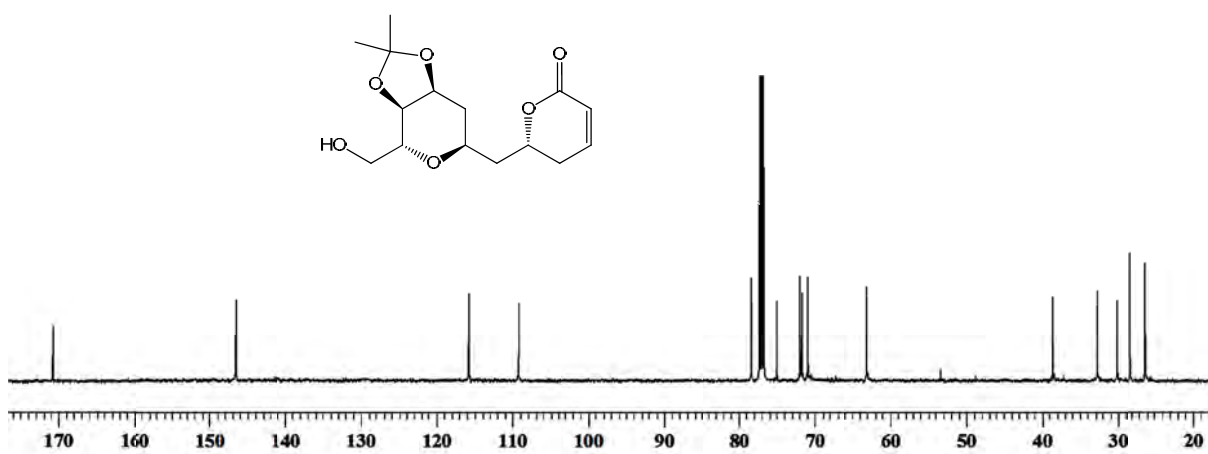

**<sup>13</sup>C-NMR OF COMPOUND 16**

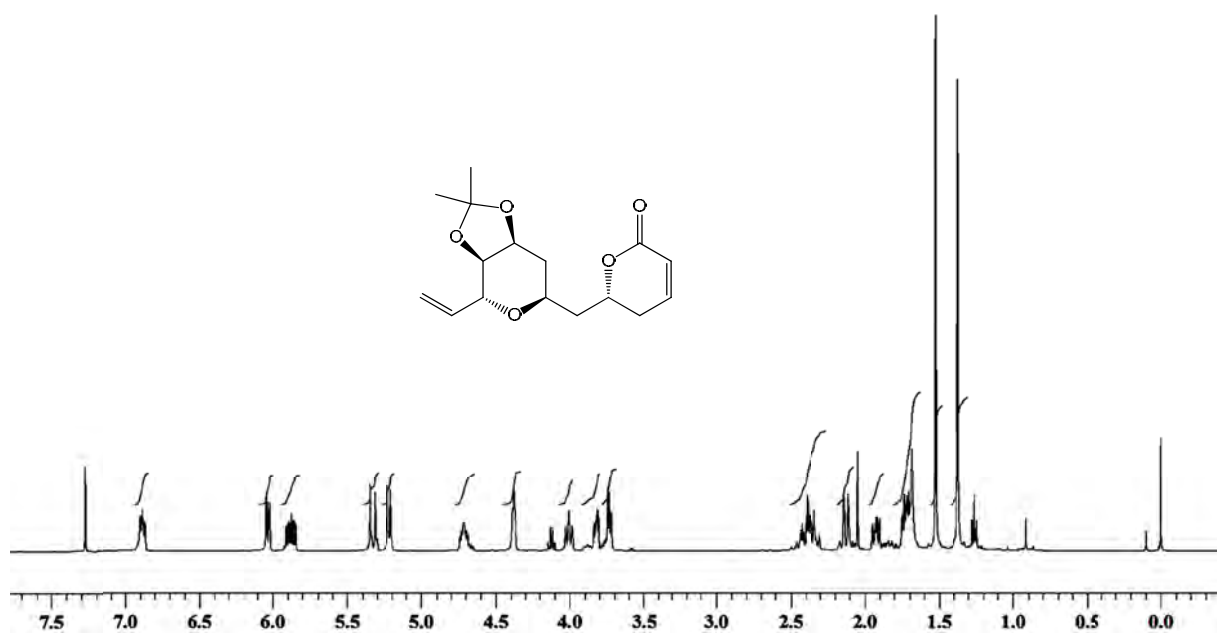

**<sup>1</sup>H-NMR OF COMPOUND 17**

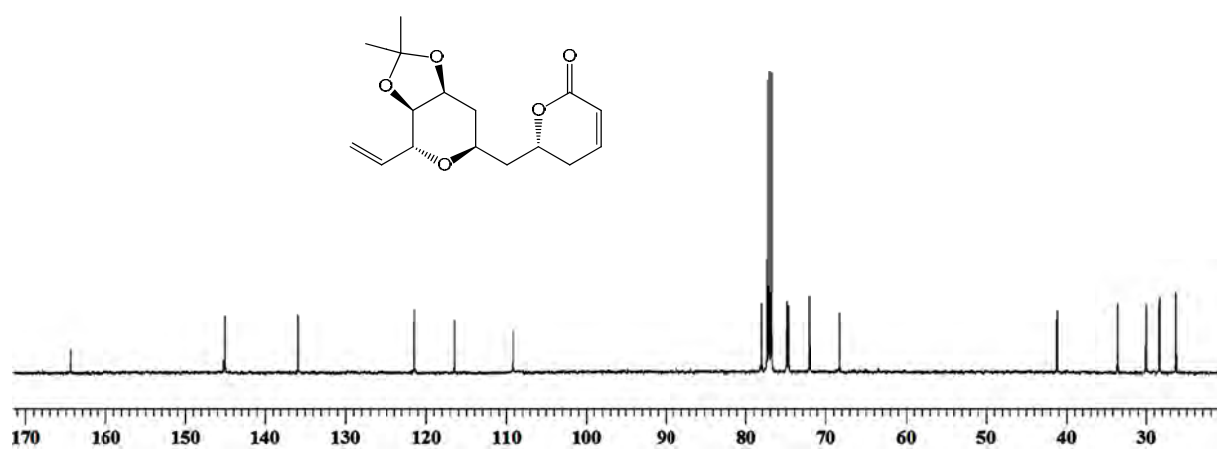

**<sup>13</sup>C-NMR OF COMPOUND 17**

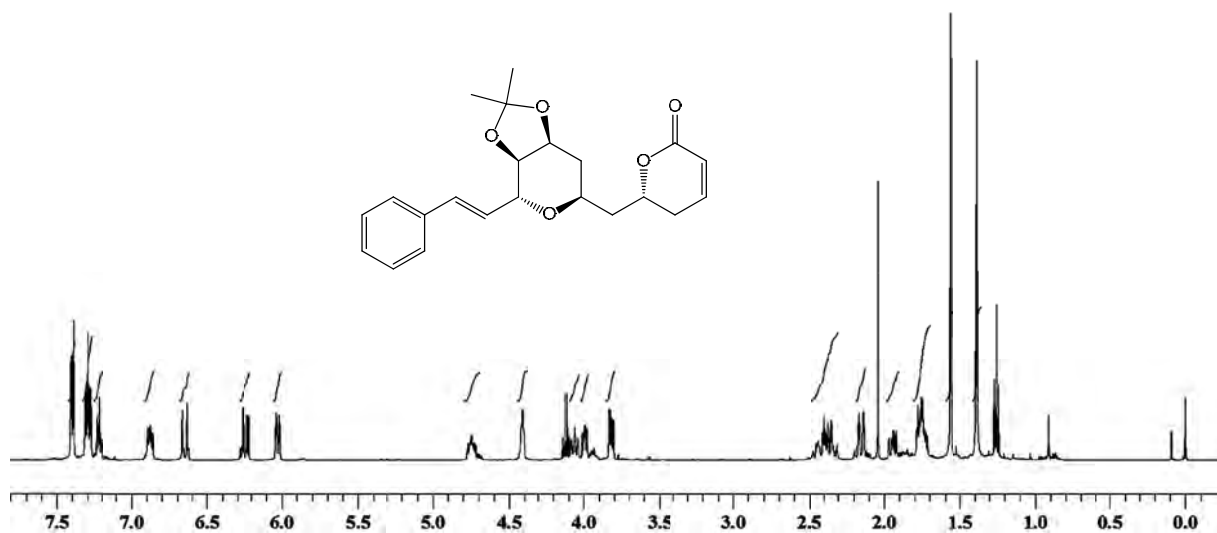

**<sup>1</sup>H-NMR OF COMPOUND 19**

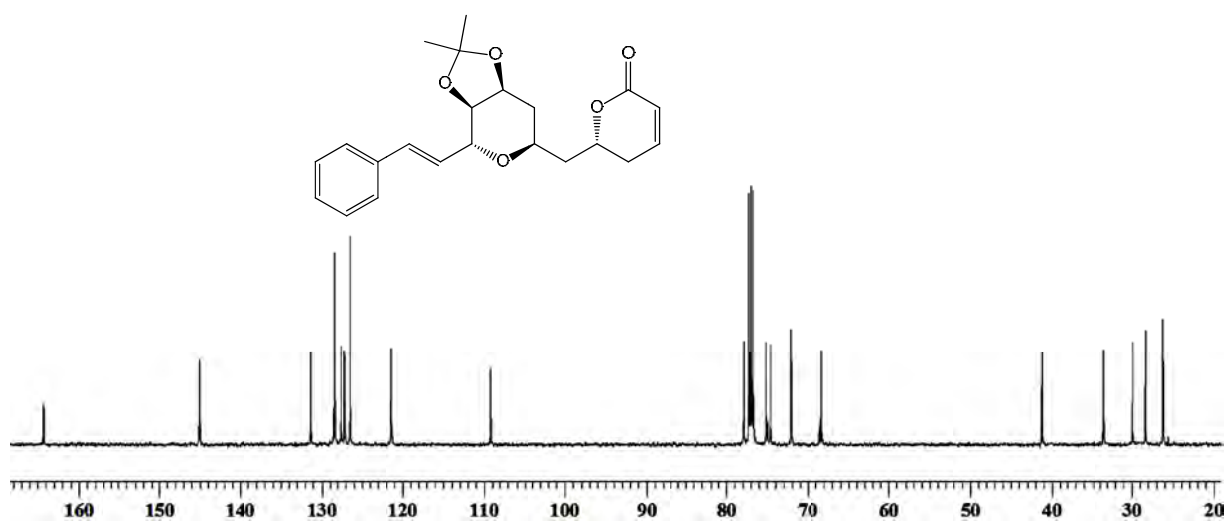

**<sup>13</sup>C-NMR OF COMPOUND 19**

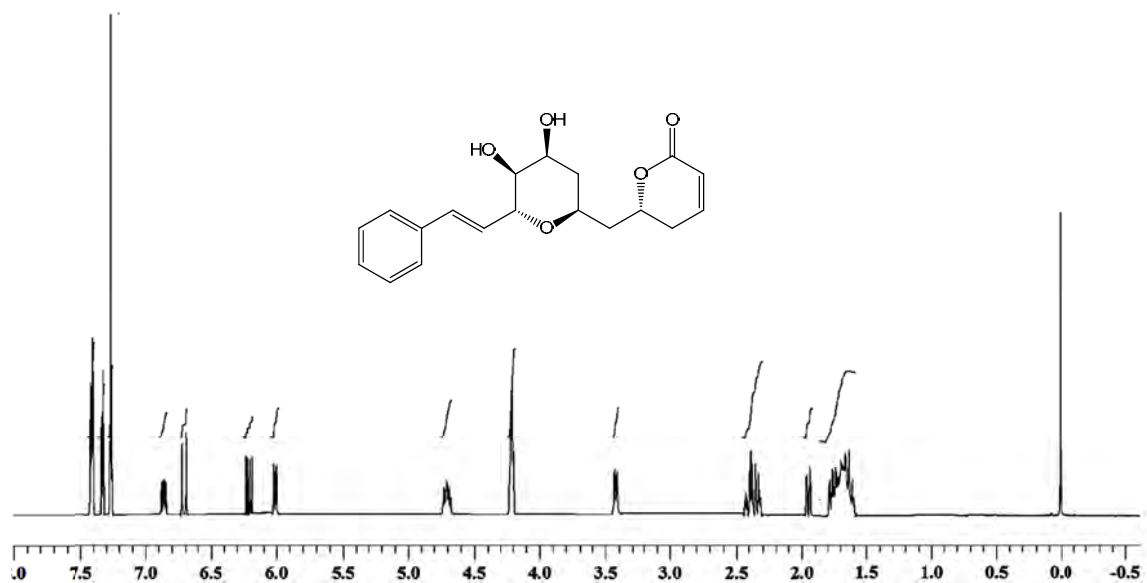

**<sup>1</sup>H-NMR OF COMPOUND 2**

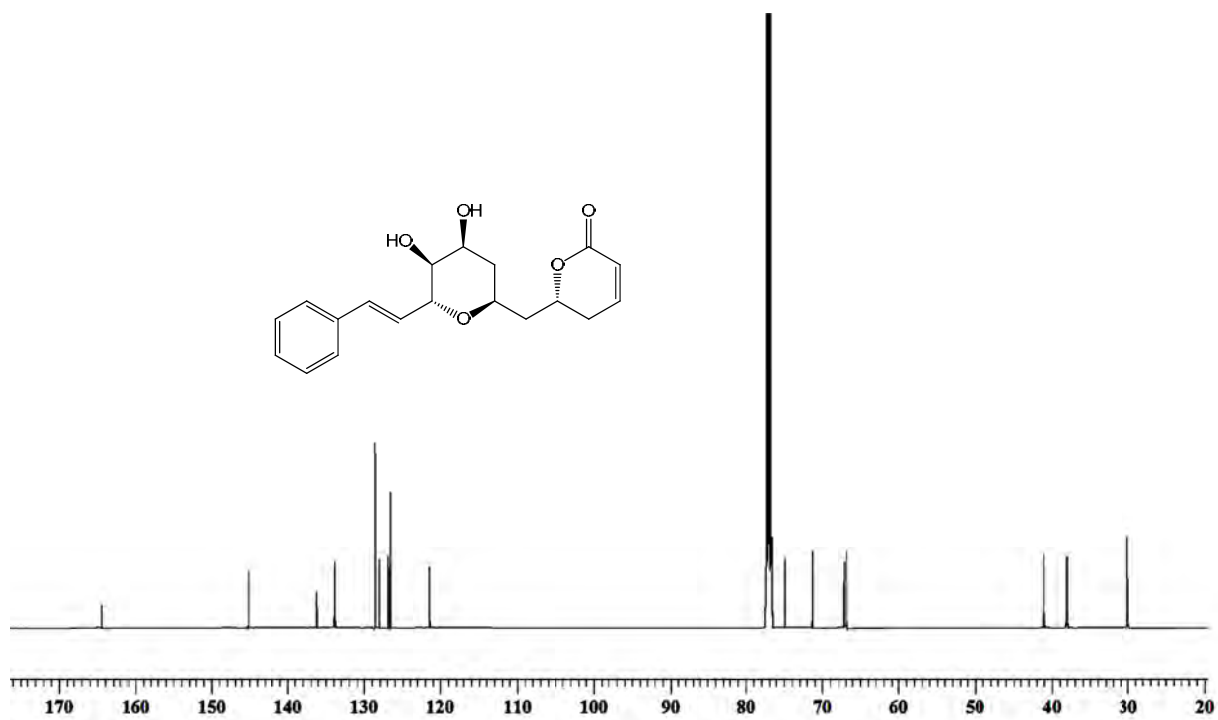

**<sup>13</sup>C-NMR OF COMPOUND 2**

**Figure 2.** NOESY spectrum showing the characteristic NOE correlations of compound **9**

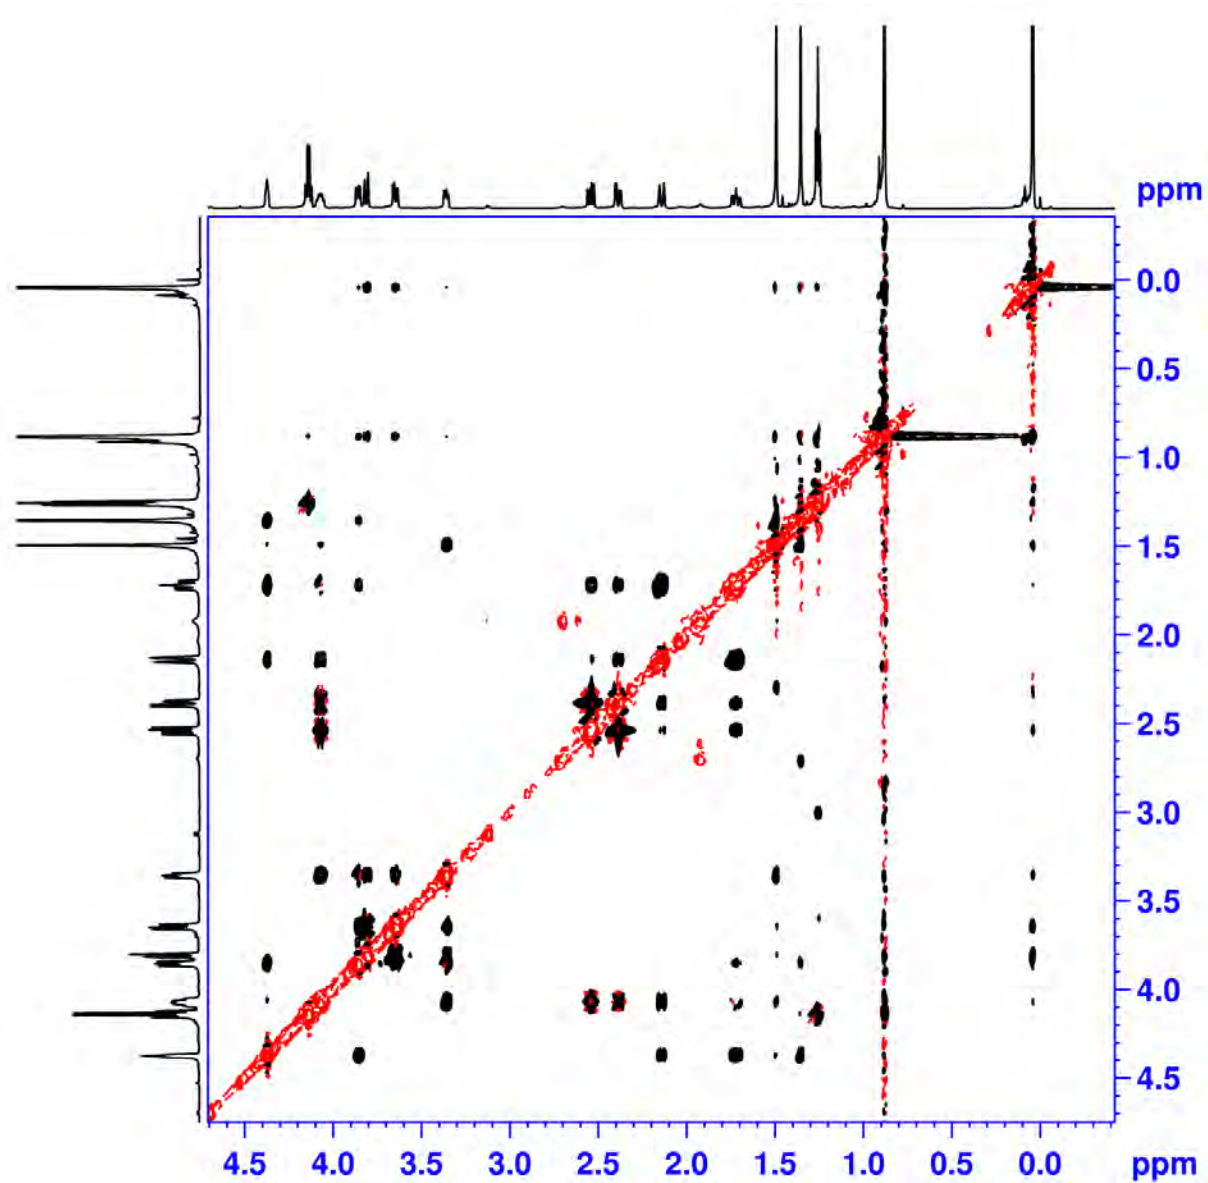

Supplement: c5ra03706a1.pdf [file c5ra03706a1.pdf]
